# Supplementary material for: Effective Apical Infection of Differentiated Human Bronchial Epithelial Cells and Induction of Proinflammatory Chemokines by the Highly Pneumotropic Human Adenovirus Type 14p1
Source: PLoS One. 2015 Jul 13;10(7):e0131201. doi: 10.1371/journal.pone.0131201 (PMC4500402; doi:10.1371/journal.pone.0131201)
Supplement: S1 Table — Multiple listing of gene names (for example, see CXCL10 (IP-10), CXCL11 (I-TAC) and IL-6) indicated that the upregulation was detected by multiple, different probes. Genes were listed by relative signal intensity in HAdV-B14p1 infection vs. mock infection. (XLS) [file pone.0131201.s003.xls]

## Sheet: ThresholdsAndNormFactors
	M#	75th Percentiles	Normalization Factors (absolute)	Normalization Factors (relative to Array 1)	Surrogate	Intensity Threshold
1. Array	M3822	2628.07	0.570761	1	15	50
2. Array	M3823	2656.73	0.564604	0.989212
3. Array	M3824	2625.52	0.571315	1.00097
4. Array	M3825	2417.73	0.620417	1.087
Reference Array or Reference Target Percentile Value	RefPercentile1500	1500

## Sheet: DataNormalizedSurrogatesUsed
GeneName	HAdV5/mock	HAdV14p1/mock
CRIP3	25.1041	1.12231
CACNA1E	4.5269	2.00134
FSHR	4.04485	1
CRB1	4.00056	1
A_33_P3421318	3.74797	1
ZACN	3.57964	1.69911
C15orf50	3.40743	0.930144
ENST00000423907	3.29231	1.00519
(-)3xSLv1	3.20697	1
LOC221814	3.14245	1.54015
AKAP5	3.12119	1
ANP32D	2.75104	1.86311
LOC729040	2.72501	0.743475
CBWD7	2.69588	1.30654
A_33_P3615955	2.68959	1.81121
AK090485	2.67215	1
IL1AF	2.66402	2.04675
ANP32A	2.6477	1.92742
SLC30A10	2.64048	1
(-)3xSLv1	2.64039	1
C11orf86	2.61898	1
F13A1	2.60405	1
DEFB110	2.47673	1
THC2653146	2.45738	1
PRY2	2.42148	0.950081
ORM2	2.39314	1.43202
ANK3	2.38105	1
A_33_P3297310	2.36686	1
(-)3xSLv1	2.35725	1
TRIM55	2.34757	1.08072
MGC16025	2.30129	1.03122
SNORA70B	2.2906	1.95544
FAM9C	2.22651	2.28241
AACSP1	2.1939	1
ADIPOQ	2.16199	1.06864
ACTA1	2.09657	1.92035
ACTA1	2.05812	2.10766
GUCY1B2	2.02038	1.35178
SLC14A1	2.01523	1.00803
ARHGAP36	2.0124	1
ACTA1	1.9923	2.25262
ACTA1	1.95233	2.10414
A_33_P3229760	1.94216	1.43151
GABRR3	1.93798	1.59825
A_33_P3379231	1.93495	0.893768
ENST00000521444	1.93402	1.39337
ZSCAN30	1.93287	2.34063
MST1P9	1.93184	1.11476
DHRS2	1.92306	1.49477
HMGB4	1.91939	1
ENST00000455269	1.9131	1
OR6T1	1.9028	1.09601
TAS2R50	1.89358	1
CTHRC1	1.89294	1.01548
ENST00000479981	1.88456	1.43927
LOC100130815	1.8803	1
LRIT1	1.87317	1
PROK2	1.85554	1.07967
FOSL1	1.8462	0.942076
C8orf67	1.84307	1.11385
PHACTR1	1.84245	1.48475
SSX3	1.84113	1
A_33_P3313695	1.83198	1.09769
PRR11	1.82318	1.38346
LPA	1.82108	1.3401
ITGB3	1.81952	1
LOC100289094	1.81222	1.98584
CTHRC1	1.79971	1.11998
LHX8	1.7969	1
CPEB1	1.78724	0.984801
A_33_P3313625	1.77953	1.5167
ARMCX4	1.77818	1.78191
ACTL8	1.77444	1.18957
RNF157	1.77252	1
GRIN2C	1.77245	1.86629
ETG10_234183	1.77112	1
A_33_P3296721	1.77072	1
A_33_P3424867	1.77055	1
YY1AP1	1.76919	1.56498
C2orf88	1.76425	1
TEX9	1.75424	1.03301
VASH2	1.75307	1.34
MFNG	1.75292	1.21776
LOC1720	1.75236	1
A_33_P3253139	1.74505	1
FAM159B	1.74456	1.03679
SAV1	1.74047	1.43916
PPP1R27	1.72797	1.45537
C11orf96	1.72318	2.01616
CTHRC1	1.72219	1.04725
PMFBP1	1.72055	1.08696
RAP1GAP	1.71856	1.17008
FBXW12	1.71736	0.894666
MATL2963	1.71719	1.33718
PRM1	1.71648	2.20581
SLCO4A1	1.7081	1.3779
C1orf88	1.70508	1.12349
CTHRC1	1.69862	1.11927
C20orf62	1.69794	0.940302
A_33_P3402294	1.69638	1.14497
SZT2	1.69613	1.7365
A_33_P3347663	1.69585	1
PRDM5	1.69259	1.25384
AK311630	1.68676	1.11772
LOC399715	1.68649	1.22342
CTHRC1	1.6837	1.12264
ITGA9	1.67991	1.47157
AK096239	1.67534	1
ENST00000415242	1.67488	1.38754
NTNG1	1.6745	0.983319
ENST00000316517	1.67365	2.04574
APBA1	1.67349	1.82295
CDRT8	1.67196	0.745656
CTHRC1	1.66989	1.05237
TRIM55	1.66915	1.0377
ADCY4	1.66808	1.58179
ENST00000441510	1.66794	1.32737
KCNH8	1.66549	1.57285
CTHRC1	1.6616	1.00284
FLJ33534	1.66136	1
CXCL3	1.65922	2.01947
LPCAT2	1.65883	1.13022
SLC22A8	1.65637	1.51369
CTHRC1	1.65088	1.06959
ESM1	1.65076	1.09501
HAND1	1.6492	1
LOC338694	1.64682	1.90658
HBM	1.64295	1.43741
A_33_P3384913	1.64191	1.03145
CTHRC1	1.64147	0.915425
PRM1	1.64109	1.44615
LOC645195	1.63931	1.35372
RNF157	1.63602	1
CTHRC1	1.6354	0.910346
SPINK1	1.63135	0.945434
LOC283710	1.63066	0.929346
TEX22	1.63041	1.2804
THC2503512	1.62935	1.13681
A_33_P3371142	1.62849	1.23017
C9orf25	1.62784	1.72117
LOC641518	1.62597	1.42099
PCDHAC1	1.62452	1.03493
IL1A	1.62277	1.25574
EXO1	1.62221	1.20351
ENST00000390468	1.62141	1.56925
A_33_P3219505	1.6198	1
SVOP	1.61759	1.28416
OR51I2	1.61586	1.06782
IL1A	1.61469	1.33096
PTGER3	1.61034	1.23044
ZNF534	1.60809	1
LOC100147773	1.60772	1.73389
A_24_P212565	1.60449	1.16331
FN3K	1.60219	1.34752
PMP22	1.60175	1.06053
LGR6	1.59876	1.10676
BST1	1.59869	0.987391
DLG2	1.59711	1.87164
ATP2B4	1.59709	1.37185
CPXM2	1.59688	1.40536
FOXL1	1.58987	1.17269
TMPRSS11D	1.58955	1.02678
ENST00000390397	1.58903	1.6586
RPS4X	1.58682	1.19125
RGL3	1.5853	1.31879
ATP2B4	1.58268	1.65228
ADAMTS8	1.58216	1
BC157839	1.57891	1.1073
LOXL2	1.57612	0.865613
C10orf92	1.57506	1.0966
NIM1	1.57406	1.19879
CBR1	1.57238	1.32648
EDN2	1.5719	0.973357
LOC100128262	1.57087	1
LOC100130547	1.57085	1.33145
CRNN	1.57028	1.32872
AIM2	1.56902	1.47631
LHX2	1.56555	1.15658
FSD2	1.56519	1.46181
ATP2B4	1.56433	1.05911
CD200	1.56357	1.2892
RCOR2	1.56275	0.779026
A_33_P3216718	1.56175	1.01792
LOC100506105	1.56119	1.71973
PCDHA5	1.55878	1.76753
NCAPH	1.55862	1.25407
C19orf26	1.55711	1.4199
SFTPA2	1.5546	1
PRM1	1.55446	1.63687
ENST00000538113	1.55317	1.25594
LOC255167	1.55305	0.998735
BIRC7	1.55289	1.36448
ENST00000390595	1.55191	1
CDH18	1.55095	1.38611
ENST00000354432	1.55041	1.99637
NARG2	1.54969	1.6612
RGS16	1.54922	1.36321
RPS6	1.54578	1.2299
APCS	1.54555	1.60304
KCNA3	1.54507	1.59177
LOC387720	1.5438	1.38624
C1QTNF3	1.54056	0.793673
IPCEF1	1.53953	1.28439
ENST00000417557	1.53769	2.02871
HIST1H2AL	1.5373	1.2203
MTVR2	1.53697	1.88855
MYLK2	1.53618	1.38836
A_33_P3383900	1.5345	1.47777
C11orf87	1.5333	1.3127
LOC254099	1.53092	1.32047
SAT1	1.5305	1.39978
ZDHHC19	1.53009	1.32157
TMEM108	1.52711	1.58045
TTTY3	1.52577	1
LOC339442	1.52456	2.01132
CRNN	1.52412	1.11755
SYDE1	1.52389	1.49307
WDR60	1.52209	1.2044
A_33_P3385671	1.52119	1.71474
CU691765	1.52051	1.1529
SNORA81	1.51961	1.17738
HIST2H3A	1.51941	1.20913
CECR3	1.51764	1.37045
TRIM55	1.51694	1.3922
ENST00000531225	1.51572	1.81743
TSHB	1.51546	1.23991
A_33_P3209566	1.514	1.34549
UNC79	1.51387	1.31058
CUZD1	1.51383	0.796033
ENST00000470348	1.51353	1.17991
EPM2AIP1	1.5128	1.29587
GAK	1.51258	1.82501
BX103560	1.51177	1
HRC	1.50995	1.83053
LOXL2	1.50969	0.869959
SPATA19	1.50925	1
NKX2-2	1.50823	1
C11orf21	1.50754	1.32832
ENST00000401694	1.5064	1.45978
PRSS37	1.50206	0.838719
ARID5A	1.50149	1.51234
ETG05_66023	1.50084	1.59882
C10orf11	1.50049	0.9467
MRPL38	1.49948	1.49749
DRD5	1.49869	1.233
OPALIN	1.49755	1.68184
FLJ44674	1.49747	1.34733
ATMIN	1.49692	1.87304
UTRN	1.49659	1.80933
A_33_P3318766	1.49595	1.39367
STK16	1.49562	1.26603
ZDHHC22	1.49417	1
A_33_P3253420	1.49397	1.28802
GPT	1.49261	0.927848
TNFSF11	1.4926	0.844905
LCK	1.4924	1.52656
COL1A2	1.49098	0.974691
CXorf36	1.49069	1.3502
ZNF485	1.49028	1.10927
PCDHB18	1.48864	0.898549
C10orf11	1.48827	0.886416
INVS	1.48798	1.15796
CCL27	1.48764	1.31073
LOXL2	1.48757	0.83245
BANP	1.48738	1.42605
AKAP9	1.48688	1.15869
PABPC1L	1.48676	1
IL1A	1.48661	1.14531
LOC100653080	1.48652	1.12407
CCDC149	1.48587	1.99113
BX538057	1.4857	1.10453
DKFZp434L192	1.48541	1.75599
SSX3	1.48535	1.27092
CSF3	1.48497	2.36465
C2orf65	1.48423	1.16501
A_33_P3267150	1.48318	1.04956
IL1A	1.48289	1.15232
NMUR2	1.48248	1.17123
LOC646482	1.4811	0.831734
HCRT	1.48044	1.08079
NPFFR2	1.48028	1.39133
TNNT3	1.47979	1.253
A_33_P3215232	1.47856	1
A_24_P366644	1.47786	1.07545
KRTAP10-4	1.47784	1.56082
PPP1R12B	1.47743	1.41293
ENST00000527620	1.47673	1.24715
LOXL2	1.47511	0.810972
KRT8P41	1.47463	1.37683
RAB3IL1	1.47365	1
FLJ44511	1.47265	1.15761
MCOLN3	1.47127	1.29809
A_33_P3336567	1.47115	1.92892
DOK5	1.46974	1
IL1A	1.46498	1.19279
LOC401320	1.46484	1.1901
LOXL2	1.46441	0.845566
TNNT3	1.46228	1.14937
ENST00000319509	1.46212	1.72076
THC2544198	1.46098	0.945459
RAB39B	1.46049	1.24916
LOC100129840	1.45999	1.43718
OPRL1	1.45965	1.4341
LCE2A	1.45949	1.3224
A_33_P3354553	1.45902	1.63179
SLC19A1	1.45695	1.60567
TMEM212	1.4569	1
LSAMP	1.45669	1.32881
SETMAR	1.45613	1.08801
CTNNB1	1.45577	1.33901
ADAMTS10	1.45498	1.062
THSD7A	1.45408	0.993505
TRNP1	1.45387	1.01537
FLVCR2	1.4537	1.24703
KCNMB3	1.45357	1.28124
LOXL2	1.45285	0.814325
MIAT	1.45159	1.32931
PRKACB	1.45138	1.12398
POLN	1.45123	1.26302
FOXI3	1.45024	1.85458
PLA2G7	1.44966	1.02792
SLC24A2	1.44956	1
CTNNB1	1.44923	1.34693
LOC338758	1.44903	1.05535
SYT11	1.44599	1.29438
KIF18B	1.44561	1.316
C4orf49	1.44542	1.01908
IHH	1.4451	0.90177
HMP19	1.44446	1.55918
GHRL	1.44425	1.08464
SLC28A1	1.44419	1.5818
OR1D2	1.44319	1.34104
LOC148696	1.44201	1.11177
UBE2CBP	1.43882	1.12573
LOC256880	1.43865	0.982684
TRAF3IP3	1.43729	1
ATP1A4	1.43557	1.07552
C10orf11	1.4353	0.975454
ZNF503	1.43479	1.54795
TTTY5	1.43405	1
RPS21	1.43338	1.4497
LOC100287879	1.43295	1.36461
OR7A17	1.43276	1.12059
ANKRD19P	1.43266	1
C10orf11	1.43258	0.80458
VIPR2	1.432	1
ENST00000543008	1.43126	1.58753
CHAD	1.43048	1.54185
CA1	1.43047	1.68215
ZNF831	1.43033	1
MYH7B	1.42986	1.01237
A_33_P3358930	1.42983	1
LOXL2	1.4293	0.84981
SPG20OS	1.42867	1.60807
LOC283050	1.42863	0.945473
SRC	1.4286	1.1724
GYPC	1.42817	1.47973
LOC152225	1.42791	0.927158
CYP27C1	1.42748	1.04991
SRC	1.42602	0.904638
OR51B6	1.42534	1.30613
NFATC4	1.42426	1.13464
C1orf213	1.42422	1.23296
LOXL2	1.42381	0.747716
LOC283089	1.42348	1
MS4A5	1.42326	1.46563
LOXL2	1.42273	0.828373
NPB	1.42269	1.78933
THC2619755	1.42183	1.37234
ABCG1	1.42027	1.13364
HNRNPK	1.41978	1.46682
SVOP	1.41962	1.21851
C1orf194	1.41909	1.29917
MGC16275	1.41873	1.68868
CTNNB1	1.41835	1.38875
RNASE7	1.41681	1.16026
A_23_P109677	1.41595	0.944578
IL1A	1.41573	1.06709
CES3	1.41535	1.89046
TM6SF1	1.41472	1.06539
A_33_P3347457	1.41424	1.49724
PRDM5	1.41235	1.26999
IL10	1.41187	1.21389
FLJ31945	1.41141	1
AB529247	1.41134	1.67573
SPP1	1.41125	1.14657
SON	1.41103	0.879241
SPDYE5	1.41096	1.05784
DDX43	1.41017	1.07787
ERCC-00012_90	1.40994	1.62354
IFITM10	1.40989	0.913788
DPPA3	1.40913	0.862024
BMP3	1.4087	1.19812
SERPINC1	1.408	0.986266
VEGFA	1.40784	1.15991
LOC606724	1.40779	1.48374
LOC728705	1.40765	0.992141
LOXL2	1.407	0.779949
AY203951	1.40615	1.38871
NID2	1.40579	1.54494
CTNNB1	1.40512	1.30851
ENST00000535200	1.40484	1.26563
LOC729041	1.40474	1.16766
CROCC	1.40436	1.01415
CXorf64	1.40359	1.25849
THC2652132	1.40347	1.11342
ENST00000368586	1.40221	1.46055
DEFB121	1.40217	1.24861
A_33_P3239989	1.40188	2.28219
OR51B5	1.40072	1.20624
FSIP2	1.40039	1
ENST00000321800	1.40034	1.43355
LAT2	1.40032	1.01009
TRDMT1	1.39918	0.912707
MYO7A	1.39892	1.17892
HSP90AB2P	1.39849	1.14133
MATN1	1.39834	1.12872
ORAOV1	1.39812	1.20692
CTNNB1	1.39723	1.2897
C10orf11	1.39698	0.903731
LOC91948	1.39637	1.01162
CTNNB1	1.39627	1.30042
LOC100131434	1.39616	1.10891
BC029571	1.39589	1
TMEM199	1.3954	0.851526
ENST00000390634	1.39539	1.73619
CMA1	1.39537	1
ABP1	1.3949	1.52011
ACPP	1.39485	1.11684
CTNNB1	1.39474	1.29576
SRSF6	1.39467	1.00166
TNNI3	1.39365	1.33681
ENST00000522356	1.39324	1.29207
TSC2	1.39279	1.2599
GHRL	1.39258	1.1005
A_23_P109677	1.39158	0.955385
VSIG10L	1.39144	1.27774
SMAP1	1.39126	1.0862
HM13	1.39126	0.915806
UBE2CBP	1.3908	0.942654
LOC400950	1.39019	1.13882
RAP1GAP2	1.38973	1.34284
A_33_P3390097	1.38939	1.19516
PPIA	1.38932	0.989397
PSMA8	1.38896	1
CLEC18B	1.38877	1.45963
ACAN	1.38845	1.50107
MAGEC1	1.38832	1.25847
PLXND1	1.38804	1.19313
CNTNAP3	1.38789	1.03735
IDO1	1.38779	1.35992
PGLYRP4	1.38737	1.26199
A_33_P3250767	1.38672	1.51916
HLA-DPB1	1.38657	1.64654
SLITRK6	1.38653	1.00636
C10orf11	1.38646	0.851845
FGD2	1.38644	1.3146
F7	1.38618	1.27645
CTNNB1	1.38609	1.31752
A_23_P109677	1.38599	0.973267
ENST00000414198	1.38582	1.35098
NP1245239	1.38523	0.978308
TBXAS1	1.38494	1.60218
DYNLT1	1.38491	1.16538
NMBR	1.38483	1.16549
KIRREL3	1.3845	1.40756
A_23_P109677	1.38444	0.958853
ENST00000398957	1.38425	1.07623
HS1BP3	1.38416	1.43454
C17orf75	1.38405	0.93703
LRTOMT	1.38318	1.67456
TRIM6	1.38223	1.41416
C10orf11	1.3819	0.866154
A_33_P3232214	1.38184	1.30962
KIAA1530	1.38132	1.61484
C10orf11	1.38127	0.911248
LOC727677	1.381	1.73853
OTUD6B	1.38098	1.3476
SCARNA9	1.38077	1.31658
TERT	1.38005	1.04833
ICMT	1.38004	1.03297
UGT3A1	1.37986	1.41546
GRIN2C	1.37985	1.4554
A_33_P3346610	1.37969	1.17032
UCHL1	1.37861	0.901903
LCK	1.37861	1.39858
NPW	1.3786	1.35704
MGC12982	1.37807	1.0174
FAM71F1	1.37737	1.08289
ALKBH5	1.37657	0.957478
ENST00000361201	1.37537	1.95071
NANOS1	1.37502	0.970141
PLIN1	1.3745	1
PKLR	1.37425	1.51757
A_24_P307486	1.37395	0.960697
CCDC48	1.37366	0.97697
GGCT	1.37353	1.25186
C8orf46	1.37346	1.10244
ZGLP1	1.37337	1.04877
C2orf65	1.37284	1.62431
FAM91A1	1.37215	0.926969
ZDHHC11	1.37187	1.27076
C11orf42	1.37182	1.26955
CTNND2	1.3718	1
HSPA8	1.37139	1.44876
A_33_P3385351	1.37089	1.22248
LOC100131564	1.37059	1.00403
CTNNB1	1.37038	1.34294
KRTAP13-4	1.37003	1.23278
ENST00000434321	1.36938	1.6084
TTLL7	1.36934	0.957601
MC1R	1.36923	1.03613
BC029255	1.36903	0.982558
IDO1	1.36902	1.44367
A_33_P3353275	1.36861	0.908624
CTNNB1	1.36856	1.22691
SLC25A47	1.36804	1.30414
FLJ43315	1.36762	1.02204
IDO1	1.36728	1.38686
ENST00000431031	1.36686	1.49079
CCDC115	1.36685	0.992607
PCP4	1.36563	1.69735
KLK13	1.36534	1.1692
C10orf11	1.36519	0.86733
PPP3R1	1.36508	1.23394
IL1A	1.36479	1.11173
LCE3C	1.36409	1.37472
CAMKK1	1.36406	1.17523
LOC728339	1.36306	1.04212
C20orf46	1.36247	1.3202
FLJ14186	1.36239	1.22469
A_23_P109677	1.36211	0.934099
ATRX	1.36198	1.18044
UBA6	1.3618	1.09921
VCY	1.36176	0.975727
GSTCD	1.36159	1.48712
SMCHD1	1.36158	1.10453
TMEM199	1.36089	0.985591
RGS16	1.36073	1.34834
PPP4R1L	1.35978	1.44909
PRRG1	1.35934	1.28009
ANKRD53	1.3592	1.27926
MBP	1.3591	1.15636
ZNF300P1	1.35903	1.2435
IDO1	1.35872	1.39679
MRC1	1.3586	1.08002
SHISA7	1.35849	1.94532
CAB39L	1.35837	1.29105
HNRNPCL1	1.35775	0.90036
LOC283174	1.35734	1
CNR2	1.35673	1.61387
NIPSNAP3B	1.35622	1.29601
MSMP	1.35597	1.31255
MRPL43	1.35571	0.954795
RNF7	1.3555	1.05641
TTC24	1.35521	1.53799
KLHL29	1.35517	1.45348
TIA1	1.35482	0.894623
CTRL	1.3547	1.94295
ENST00000390247	1.35463	1.05634
A_24_P366415	1.35433	0.943833
CD8A	1.3536	1.10605
GULP1	1.35283	0.960731
A_24_P15821	1.35254	0.932447
TRIM53P	1.35251	2.13328
WRNIP1	1.35221	0.941591
TRIM77P	1.352	1.2695
RALYL	1.35095	1
AGT	1.35073	1.06202
P2RX5	1.35013	1.7664
MAP1B	1.35002	1.03845
SFTPB	1.34984	0.985953
PALM2	1.34948	1
SFTPB	1.34917	0.89903
LCORL	1.34844	1.02857
ENTPD5	1.34841	1.01862
IGLL1	1.34841	1.461
MLANA	1.34825	0.940607
GOT1L1	1.34818	1
ENST00000514853	1.34801	1.50397
A_33_P3313940	1.34715	1.69283
TMEM200A	1.34714	1.03603
CALCA	1.34684	1.06603
PHGDH	1.34666	1.09051
AIF1L	1.34597	1.80032
ZNF687	1.34577	1.0755
OSM	1.34546	1.18238
A_33_P3274422	1.34535	1.17293
RAMP1	1.34518	1.02572
FAM90A7	1.345	1.20488
SRC	1.34497	0.984731
ENST00000431031	1.34473	1.29349
MRPS23	1.34446	1.00174
PADI2	1.3444	1.06193
MMP12	1.3436	0.75378
SETD4	1.34271	1.06823
DUSP5P	1.34222	1.15456
HIST2H2BF	1.34138	1.04447
KDR	1.34125	1.30202
IGSF3	1.34124	1.16006
C12orf11	1.34045	0.951803
ERLIN1	1.33932	1.02947
ARSK	1.33928	1.07576
CD200	1.33915	1.03187
EEF1A1	1.33909	1.03953
OR13A1	1.3387	0.934241
IL6	1.33855	2.49422
A_33_P3325336	1.3383	1.05907
GULP1	1.33772	0.970049
SPIRE1	1.33696	0.922528
LOC401431	1.33671	1.02412
ADRB3	1.33648	1.08543
UGT3A1	1.33612	1.51818
IDO1	1.33603	1.42288
CWH43	1.3359	1.12366
SRGN	1.3358	1.12274
SYCE3	1.33579	1.10041
PDGFA	1.33577	1.12156
MRPS23	1.33562	1.00209
LCK	1.33542	1.66656
LOC100128304	1.33522	1.96114
GJD3	1.33518	1.19163
RPS27	1.33512	1.34439
SNAR-C3	1.3345	1
CWH43	1.33441	1.16557
IDO1	1.33436	1.37704
FLJ13744	1.33433	0.90289
SIRT5	1.33395	1.13274
FLYWCH1	1.33384	1.09231
A_23_P109677	1.33284	0.941141
SLC22A20	1.3328	1.11934
LCK	1.33279	1.43406
IL6	1.33257	2.36262
IDO1	1.3321	1.40703
ERBB2	1.33208	1.03883
DNAH12	1.33196	0.957396
ACAD10	1.33182	1.22962
CTNND2	1.33166	1.93928
ENST00000376271	1.33157	1.24196
PDLIM3	1.33083	1.17224
SGSM3	1.33023	1.30288
POLR2J4	1.33006	1.63545
IDO1	1.33006	1.4503
LILRB3	1.3293	1.33634
LOC100131015	1.32929	1.66111
A_33_P3248222	1.32915	1.32284
C10orf11	1.32897	0.915466
HTR1E	1.3289	1.20177
RGS4	1.32886	1.11539
IGF2	1.32867	1.10309
KLK6	1.32829	0.893284
GHRL	1.32766	1.25971
SLC3A1	1.3274	1.06588
ADAM22	1.32725	1.51438
TGFA	1.32706	0.946698
SSU72	1.32666	1.00634
DKK2	1.3265	1.09328
OSBP2	1.32604	1
FRMD1	1.32595	1.18607
MMP9	1.32569	1.05419
KLF11	1.3256	0.840363
CALCA	1.32548	1.02216
RNF112	1.32482	1.08414
MYB	1.32398	1.09485
ODF2	1.32389	0.885471
CWH43	1.32365	1.07796
ANKRD43	1.32348	0.907597
CRIM1	1.32343	0.951189
FAM40B	1.32333	2.04712
GPR113	1.32326	1.52405
ENST00000380330	1.32307	1.0337
MATN1	1.32279	1.22517
PRRT2	1.32228	1.21058
RIMS3	1.32206	0.996573
PFKFB3	1.32188	1.09969
SLC2A1	1.32176	1.71888
KRT34	1.32173	1
ENST00000506053	1.32171	0.992306
SEBOX	1.3217	1.14834
LOC729178	1.32137	1.19649
DQ272581	1.32106	1.51957
THC2567789	1.32105	1.58443
TSL	1.32086	1.10063
OBSL1	1.32075	1.0862
AGT	1.32058	1.06437
RREB1	1.32029	1.26555
COX11	1.32005	1.28349
RNGTT	1.32003	0.948398
THPO	1.31986	1.44332
CT47A11	1.31977	1.4606
A_24_P58727	1.31965	0.889917
FAM58A	1.31952	1.05463
BDNF	1.31935	1.10716
PROC	1.31929	1.10905
A_33_P3415086	1.31922	1.06128
ATP2B4	1.31907	1.75418
ZFP2	1.31882	0.993492
CD248	1.31878	1
ERN1	1.31866	1.65522
USP32	1.3186	1.32247
FAM129C	1.31843	1.09975
SCARNA17	1.31823	1.26603
LOC554223	1.31804	1.30689
AVIL	1.31788	1.20661
CCDC8	1.31746	1.38193
PCDHB15	1.31719	1.10328
PPARG	1.31698	1.15793
ENST00000390431	1.31694	1.58486
DDI2	1.31687	1.53006
FLJ38109	1.31686	0.880536
SP140	1.31641	1.06757
A_33_P3261097	1.3164	1.06621
TAS2R14	1.31615	0.890354
FLJ36644	1.31604	0.809649
A_23_P109677	1.31584	0.933697
SPP1	1.3155	1.05775
SSX4B	1.31532	1
ANKRD20A1	1.31529	1.23898
KREMEN2	1.31455	1.03104
MTFP1	1.31399	0.995634
LEAP2	1.31362	1.07269
LOC400084	1.31359	1.16533
C14orf99	1.31341	1.29486
LOC644189	1.31312	1.01488
ZNF765	1.31304	0.786672
LOC155060	1.3128	1.06033
LOC284513	1.31244	1.3635
CRNN	1.31234	1.26342
C15orf27	1.31231	1.19149
MRPS23	1.31227	1.06154
CCR5	1.31163	2.04693
ABCA1	1.31135	0.931864
RAD21L1	1.31113	1.12572
STARD9	1.31101	1.18774
DTNBP1	1.31061	1.03187
FLJ31715	1.31048	1.0966
ITGAM	1.31048	1.3391
LOC645202	1.30995	0.925771
SPP1	1.30965	1.07303
ENST00000399576	1.30936	1.22876
FANCD2	1.30923	1.04613
THC2694673	1.30914	1.04529
ENST00000431031	1.30901	1.12327
MAPK13	1.3086	0.93765
ENST00000442192	1.30856	1.13778
S77011	1.30849	1.76384
THC2540172	1.30846	1.62702
A_33_P3227010	1.30843	1.42758
OTUD6B	1.30828	1.14666
ARHGEF33	1.30815	1.12361
SRC	1.30786	0.940439
IL17D	1.30761	1.01455
PPIA	1.30729	0.915891
LOC729313	1.30692	0.878808
LYG1	1.30679	0.974091
FETUB	1.30672	0.944725
MMP9	1.30671	1.08692
ACOT4	1.3067	1.11214
SLC31A1	1.30663	1.17913
ZDHHC11	1.30658	1.13373
ZSCAN22	1.30632	1.01689
SLC38A8	1.30614	1.53273
CWH43	1.30596	1.07077
LOC100128517	1.30594	1
FAM151A	1.3059	1.53544
PLA2G2C	1.30572	1.47219
ENST00000523862	1.30564	1.21695
ERF	1.30557	1.38778
PDGFA	1.30548	1.10733
RASSF2	1.30538	0.832674
ENST00000445031	1.30533	0.948165
GNAZ	1.30515	0.823967
AGT	1.30478	1.02204
ENST00000511256	1.30475	0.997994
LOC400891	1.30455	1.2049
MMP9	1.30441	1.08501
WHSC1L1	1.30409	0.857777
LCE1B	1.30376	1.221
GLYATL2	1.30362	1.01292
CPXCR1	1.30354	1.53805
PPIAL4A	1.30337	0.913685
FOXF1	1.30329	1.61903
PCP4	1.30324	1.67536
GDF5	1.30293	1.112
LOC646976	1.30272	1.04364
IL1A	1.30239	0.987946
OR2B2	1.30217	1.16478
WASH1	1.30212	1.16312
CXCL12	1.30199	1.37849
C2orf54	1.30193	0.884504
GABRE	1.30193	1.12068
LOC388387	1.30174	1.37579
SPP1	1.30166	1.09539
TAS2R14	1.30148	1.47903
SPP1	1.30147	1.11597
A_33_P3410019	1.30141	1.29552
A_23_P109677	1.30114	0.929054
KIAA1683	1.30107	1.05548
TUBAL3	1.30065	1.10831
NADKD1	1.30046	0.907085
MMP9	1.30031	1.0535
FAM194A	1.30025	1.04208
DOCK9	1.30025	1.23534
FBXL22	1.29982	1.3532
KREMEN1	1.29966	1.46499
CWH43	1.29944	1.05245
A_33_P3239414	1.29937	0.919716
ZNRF2P1	1.29913	0.971369
A2M	1.29893	1.17756
SLC14A2	1.29879	1.17253
FABP6	1.29851	1.15229
C10orf137	1.29809	1.29298
DNAJC14	1.29803	1
A_23_P109677	1.29784	0.894536
HSD17B6	1.29774	1.17356
FAM58BP	1.29752	0.982907
JPH4	1.29737	1.23569
A2M	1.29715	1.27326
MRPS23	1.297	1.00631
UGGT1	1.29686	0.993984
GHRL	1.29614	1.11249
DACT3	1.29609	1.0971
ENST00000440451	1.29602	1.04238
LOC441268	1.29589	1.03525
SLC25A27	1.29582	1.1749
SRRM4	1.2958	1.05541
THC2703660	1.29566	1.35568
ENST00000382488	1.29528	1.01153
LOC285181	1.29487	0.746398
A_23_P109677	1.29413	0.905313
CTPS2	1.29393	0.922826
THC2544756	1.29385	1.47406
C16orf79	1.29372	1.23672
CPA3	1.29348	1.61846
NOG	1.29347	1.40729
ATP6V0E1	1.29345	0.95466
MAST4	1.29305	1.52676
MIRLET7BHG	1.29302	1.62331
PDGFA	1.29283	1.10203
FRRS1	1.29281	1.221
TRIM50	1.29256	1.22982
C5orf65	1.29245	1.01707
A_33_P3321120	1.29244	1.70836
MDM2	1.29202	1.32613
PARG	1.29187	1.249
CDK5R1	1.2918	0.938979
CF593606	1.29118	0.929928
IL6	1.29089	2.19249
ENST00000304488	1.29086	1.31467
MRPS23	1.29084	0.992917
RGN	1.28991	1.26773
SCXA	1.28966	1.32763
C16orf96	1.28959	4.13435
LOC389791	1.2888	1.26528
SPP1	1.28877	1.1544
PIGQ	1.28871	1.05344
PRRG3	1.28869	1.29137
MAP3K12	1.28845	1.41337
AHNAK	1.28844	0.872078
ARHGAP40	1.2884	1.22117
TSPAN11	1.28808	1.05605
BTNL2	1.28805	1.55958
LCP1	1.28801	1.14723
KCNC4	1.2877	1.56725
POM121L12	1.28743	1.19834
FOXN4	1.28707	0.928709
XR_132526	1.28706	1.35821
A_33_P3221888	1.287	1.26451
PDGFA	1.28686	1.14055
NRSN2	1.28686	1.14595
CD200R1	1.28673	1.07552
ZNF341	1.2864	1.04806
MSX2P1	1.28621	1.13248
LOC729032	1.28593	1.10596
ENTPD1	1.28569	1.37539
A_33_P3214284	1.28565	1.36906
NR6A1	1.28564	0.85645
MAT1A	1.28552	1.15287
MMP9	1.28552	1.02925
C18orf34	1.2855	0.856002
FLJ31104	1.28534	1.02261
STC2	1.28509	1.0111
HSF2BP	1.28499	2.38043
SPP1	1.28469	1.0607
SPIN3	1.28457	1.22804
DBIL5P	1.28431	1.0324
CEACAM7	1.28418	1.10752
AK124259	1.2839	1
ADAMTSL2	1.28376	1.39714
A_33_P3266022	1.28338	0.971674
PPIA	1.28331	0.975072
DZIP1L	1.28299	1.08944
ZNF485	1.28298	1.05321
TBC1D10C	1.28279	1.12113
IDO1	1.28264	1.33879
TDRD9	1.28261	0.698102
LOC100652851	1.28231	1.09997
CD19	1.28229	0.985963
CYS1	1.28218	2.12999
CIT	1.28195	1.08353
ENST00000407723	1.28184	0.90717
AGBL4	1.28171	0.933143
C14orf149	1.28166	1.06961
GOLGA6L6	1.28163	1.55664
LBH	1.28114	1.10393
SPP1	1.28107	1.13184
C19orf42	1.28059	0.929771
THBS3	1.28056	1.66917
IL6	1.27988	2.19457
RRAGC	1.27977	1.08129
MEAF6	1.27971	1.0768
SPACA5	1.2797	1.54084
SAA4	1.27966	1.18638
A_24_P221485	1.27965	0.958669
MMP9	1.27964	1.01167
WIPF3	1.27951	0.92162
TMEM57	1.27943	1.03866
BRK1	1.27943	1.16822
CRLF2	1.27925	1.43302
IFNGR2	1.27922	1.02322
BDKRB1	1.2792	0.828942
ENST00000444348	1.27903	0.996994
PATL2	1.27886	1.01188
C8orf42	1.27879	1.17082
CD200R1	1.27876	1.2069
SYCE3	1.2787	1.08926
MMP9	1.27868	1.05075
EMG1	1.27793	0.977616
COL5A1	1.27745	1.4353
THC2679903	1.27742	0.933348
SELPLG	1.27738	1.04979
OPN1SW	1.27738	1.56885
ENST00000379317	1.27705	1.44278
UCN	1.27695	1.02341
CYP4F2	1.27677	0.978732
SVOP	1.27676	0.973095
TNNC2	1.27665	0.936412
AFG3L1P	1.27664	1
RAB5C	1.27639	1.29729
NR5A2	1.27638	1.09852
ENST00000356370	1.27621	1.0538
TNFRSF25	1.27591	1.13805
A_33_P3219138	1.27585	1.17106
FAM90A1	1.27581	1.11613
ITIH4	1.27574	1.15932
LOC642335	1.27571	1.42978
GLOD5	1.27567	1.18556
RNASE4	1.27566	1.0188
OR1S1	1.27554	1.11502
TMEM52	1.27553	1.49779
BC030764	1.27534	0.886224
LOC283575	1.2751	1.45765
LOC100289580	1.27509	1.47083
AGT	1.27495	1.01272
FLJ34208	1.27491	1.14977
AGT	1.27485	1.05312
CR736467	1.27478	1.7876
DBH	1.27478	1.34432
PEX5	1.27462	1.21818
YBX2	1.27462	1.1795
THC2674526	1.27451	1.29031
ZNF780B	1.27439	1.40664
EPM2A	1.27433	1.03796
CORO2B	1.27424	1.09093
MARS	1.27422	1.01183
GRIK2	1.27406	1.09982
FAM58A	1.27387	0.885953
ENST00000432377	1.27376	1.11385
SRC	1.27369	0.909562
AF289562	1.27343	1.1655
CGB	1.27342	1.28046
TSPAN7	1.27312	0.98362
CABLES1	1.27311	0.970186
MACROD2	1.27301	1.00208
OR51G1	1.27266	1.42975
SH3KBP1	1.27246	1.36635
CRNN	1.27239	1.11241
CYP3A5	1.2723	1.20731
NMUR2	1.27227	1.18538
ASCL2	1.27218	1.11856
RBM44	1.27202	1.45234
SPP1	1.27193	1.03948
SUPT3H	1.2719	1.23195
BC036832	1.27185	1.39528
CYP24A1	1.27185	1.38281
TNNI1	1.27165	1.52365
GIPC2	1.27158	1.06267
GRK4	1.2715	1.28249
WDR66	1.27135	1.01106
RAB5C	1.2713	1.28162
RAB3B	1.27094	1.00474
MMP9	1.27087	1.05759
RAB5C	1.2707	1.34494
TOE1	1.27069	1.28126
LOC100129869	1.27047	1.33489
SCT	1.27	1.32718
IL6	1.26998	2.41642
KSR2	1.2697	0.931357
GNRH1	1.26968	1.0312
AMOT	1.26959	1
C9orf43	1.2693	1.1306
SERPINA5	1.26929	1.38527
IL3RA	1.26928	1.01423
TMTC3	1.26923	1.03289
CDHR3	1.26888	1.1863
NEAT1	1.26888	1.42412
UCA1	1.2688	0.898699
CELSR3	1.26879	1.28792
ENST00000431031	1.26878	1.24606
SRF	1.26878	0.936923
LOC100506866	1.26848	1.13475
PVRIG	1.26823	1.80704
LOC100134040	1.26813	1.47525
ADM2	1.26779	1.07256
LOC100128288	1.26776	1.17039
ENST00000433110	1.2675	1.15348
LOC100130887	1.26655	1.16446
IDO1	1.26652	1.36473
A_33_P3343305	1.26651	1.44969
A2M	1.26651	1.22432
A_24_P67748	1.26642	1.09107
CDCA7L	1.26636	0.981326
LOC651536	1.26618	1.46037
RASGRP3	1.26613	1.24621
SYN2	1.26608	0.954352
NEXN-AS1	1.26596	1.28064
CDH12	1.26595	1.23638
OXER1	1.26503	1.14833
ENST00000269201	1.26503	1.20449
DYRK1A	1.26503	1.75404
C6orf103	1.265	0.992964
APOBEC3H	1.26499	1.12794
CRLF2	1.26492	1.37979
ITGAM	1.2648	1.3359
CRNN	1.26474	1.59127
CEP350	1.26472	1.14373
TNFAIP3	1.26471	1.14343
TSSK4	1.26462	1.29392
KLC4	1.26424	1.3342
BCL2L11	1.26407	1.23622
SRC	1.26396	0.919333
MAPK13	1.26364	1.02149
LOC284080	1.26362	0.995802
GCGR	1.26354	1.03423
C9orf41	1.26346	0.997706
TRIB3	1.26337	0.911565
GMPS	1.26327	0.991689
NFKBIA	1.26319	1.13674
ULBP1	1.26311	1.07088
LONRF2	1.2631	0.90394
A_33_P3374170	1.26294	1.08203
BNIP1	1.26285	1.07937
OR52N4	1.26278	1.28843
NPL	1.26271	0.85788
ENST00000504184	1.26251	1.48418
VASH2	1.26228	1.08985
DBNDD1	1.26212	1.36686
LOC100134285	1.262	1.16596
CMYA5	1.26194	1.1303
CPO	1.2619	1.21676
STK31	1.26186	1.25264
MBD6	1.26185	1.16382
SAA4	1.26144	1.1771
PPIA	1.26122	0.937107
A_33_P3325330	1.26115	1.18633
A_33_P3424826	1.26113	1.23898
TCAP	1.26099	1.19663
IL6	1.26097	2.19835
DEFB108B	1.26093	1.38133
LOC554206	1.26084	1.08852
CWH43	1.26083	1.08356
A_33_P3237344	1.26064	1.00698
ATP8B3	1.26036	0.889845
KCNJ1	1.26023	1
ENST00000432978	1.26009	1.43724
ZNF664-FAM101A	1.26004	1.44093
WIPF3	1.25998	1.14616
LOC100130548	1.2599	1.03466
MST1	1.2598	1.24185
LOC145783	1.25979	1.34212
SLC32A1	1.25944	1.26025
LOC100505648	1.25937	1.10883
TRIM55	1.25906	1.26793
SCN1A	1.25898	1.21985
FAM65B	1.25877	1
SLC7A5	1.25864	1.17034
PPIA	1.25859	0.949085
A2M	1.25851	1.17576
TTTY17A	1.2584	1.21423
MRPS23	1.25808	0.962797
CLDN16	1.25796	1.10344
LOC100133315	1.25795	0.839184
PTPN20B	1.25795	1
PPP2R5D	1.25777	1.01776
CLK1	1.25764	1.18861
C2CD4A	1.25749	1.15109
DEFA8P	1.25719	1.43504
MCOLN3	1.25691	0.948346
CWH43	1.25683	1.02635
BMP6	1.25681	1.36952
CASP8	1.25678	1.11074
TEX14	1.25653	0.776015
GPR124	1.25632	0.647427
LOC100132147	1.25627	1.22542
CWH43	1.25611	1.07178
SAA4	1.25602	1.23158
RHBDD3	1.25597	1.66954
A_33_P3277970	1.25589	0.720918
MRPS23	1.25586	0.961649
RAB5C	1.2558	1.37192
SLC6A5	1.25572	1.40785
MMP9	1.25551	1.04562
PLAU	1.25534	1.20495
NPR3	1.25485	0.911755
UBE2D3	1.25478	1.06882
A_33_P3404759	1.25478	1.27982
PRAMEF22	1.25475	0.89471
OR51G1	1.2547	1.52521
(+)E1A_r60_3	1.2544	1
MAN2A1	1.25418	0.944051
LGALS3	1.25407	1.00808
RHOF	1.25387	1.07744
A_33_P3303302	1.25362	1.36412
MRPS23	1.25357	0.972038
LRFN1	1.25351	1.35808
VEGFB	1.25349	0.878123
CYP27B1	1.25342	0.913947
ELN	1.25309	1.07473
PCP4	1.25305	1.37079
PLCB1	1.25292	1.14504
ENST00000381524	1.2529	1.46617
PPIA	1.25267	0.920591
PITPNC1	1.25236	1.43966
AGAP1	1.25233	1.43218
SPACA3	1.25213	1.29497
BMP2	1.25207	1.06078
ERBB2	1.25182	1.02259
CXCL12	1.25178	1.02674
ST3GAL6	1.25176	1.02428
MMP9	1.25173	1.00109
CELA3B	1.2517	0.941987
PTAR1	1.25168	1.33648
WDR87	1.25149	1.48871
KPNA5	1.25109	0.909953
C15orf34	1.25109	1.25007
SRC	1.25094	0.927934
LRPPRC	1.25022	1.20431
A_33_P3274184	1.25018	1.81935
ATP1A1	1.25012	1.06805
PARVG	1.25005	1
GOLGA7B	1.24988	0.858698
IL6	1.24985	2.12175
DBH	1.2495	0.919249
NXNL2	1.24943	1.48936
A_33_P3256293	1.24942	1.17447
GRIPAP1	1.2494	1.62756
EML6	1.24925	0.83183
FBXL14	1.24907	1.02984
PLCB3	1.24898	1.19444
GRIK3	1.24895	1.30332
EID2B	1.24894	1.22572
DPM3	1.24882	1.39709
IGF1	1.24873	1.3358
LOC388152	1.24872	0.998699
MIPEPP3	1.24867	0.958964
LOC100128348	1.24864	1.26837
NEURL1B	1.24858	1.294
KCNJ5	1.24839	1.62749
PPARG	1.24803	0.980156
C6orf145	1.24799	1.20958
NR1I3	1.24794	1.67717
OOEP	1.24784	0.959235
PMFBP1	1.24765	1.44339
SRC	1.24712	0.959336
OR10H1	1.24677	1.4131
MAFF	1.24624	1.1946
RTN1	1.24605	1.00467
NGRN	1.24604	1.00664
PPP1R8	1.24569	1.28656
RRP7B	1.24563	1.28101
SETBP1	1.24561	1.02624
MYO16	1.24544	0.865788
HDAC8	1.24539	1.00359
C1QL2	1.24537	1.01613
LRRC70	1.24528	0.941063
SIRT5	1.24491	1.05507
IL1B	1.24473	0.940855
MRPS23	1.24467	0.998961
FAM193A	1.24466	1.07084
SPRN	1.24463	1.80171
KRTAP5-5	1.24455	1.20173
ZNF192	1.2445	1.12863
MFNG	1.24443	1.25511
MRPS23	1.24443	0.929684
CD70	1.24441	1.2348
EEF1A1	1.24437	1.05684
ENST00000449075	1.24429	1.03178
SLC47A2	1.24421	0.958012
DNAH12	1.2442	1.40762
ZNF621	1.24392	1.12935
ADAM28	1.24365	1.00716
INCA1	1.24357	1.28137
PPIA	1.24353	0.943901
AKR1C1	1.24349	1.08376
CSNK1E	1.2429	1.14919
ERCC6L	1.24232	1.0187
CTPS2	1.24227	0.948779
CWH43	1.24201	1.0394
AGT	1.24197	0.99493
MOV10L1	1.24159	1
LDHA	1.24137	0.944319
PSMD6	1.2413	1.04231
SAA4	1.2412	1.15471
AGT	1.24116	1.00898
NOL4	1.24107	1.35403
APOBEC3B	1.24086	1.13314
KIAA0907	1.24085	1.07756
ASMT	1.24081	0.996798
RAB5C	1.2408	1.29601
RGPD6	1.24066	1.21483
TJP2	1.24053	1.47273
PKD2L1	1.24038	1.17095
ENST00000308739	1.24037	0.964051
LOC400743	1.24035	1.35855
DDX3Y	1.2403	0.966766
ENST00000498435	1.24007	1.06502
MYLK	1.23997	0.937283
PPIH	1.23981	0.908247
ENST00000431031	1.23972	1.09547
C10orf25	1.2397	0.964149
SLAMF9	1.23965	0.860719
NFKBIA	1.23956	1.08477
RASD1	1.23953	1.08194
LOC200261	1.2395	1.2515
LOC284023	1.23939	0.996283
GRB10	1.23934	0.956973
C20orf118	1.23932	0.885966
PSMD6	1.23927	1.00662
CYB5R4	1.23923	0.851986
A_33_P3209696	1.23903	1.43834
INCENP	1.23902	1.10499
RAD51AP1	1.2389	1.07951
FOXP2	1.23878	1.1053
UAP1L1	1.23846	1.43005
MAP3K14	1.23836	1.12715
ME3	1.23834	1.14714
ENST00000356722	1.23832	1
C22orf46	1.23831	1.3711
ATP6AP1L	1.2382	0.979106
A_33_P3258324	1.23818	1.3287
SCD5	1.23817	1.07983
SEC31B	1.23808	1.06181
PDCL	1.23805	0.956304
PABPC1L	1.23803	1.30885
THC2638856	1.23798	1
FBXO31	1.23758	1.20613
MYOZ3	1.23747	1.31728
PPP4R4	1.23747	1.03217
PPIA	1.23745	0.97104
PNMT	1.23742	1
C19orf54	1.23733	1.34616
NEO1	1.23733	1.23038
GRB10	1.23725	0.893828
OR2B2	1.23724	1.1807
VLDLR	1.23719	0.902859
ECHDC3	1.23718	1.10072
RNASET2	1.23708	1.40254
TCF20	1.23707	1.26302
PRIM2	1.237	1.09665
SPRY1	1.23674	1.06728
PDE4DIP	1.2366	1.07829
G0S2	1.23658	1.03823
LOC100506650	1.23646	1.3417
RPTN	1.23638	1
AGAP11	1.23624	1.33889
PTK2	1.23612	1.23398
SNAP23	1.23598	0.996866
FAM118A	1.23593	1.21729
LOC100499183	1.23589	1.01107
ENST00000442269	1.23538	1.17733
PTCD3	1.23536	0.744226
ENST00000390319	1.23535	2.08372
LOC285696	1.23524	1.31667
C9orf50	1.23523	1.07355
MAGEA8	1.23512	1.17676
A_33_P3412556	1.23471	1.20112
OR14C36	1.23471	1
C6orf94	1.23453	1.3551
SCN3B	1.2345	1.15391
OTUD6B	1.23444	1.07423
SF3B1	1.23441	1.02292
TMEM52	1.23422	1.07887
ENST00000380336	1.23414	1.04729
OR2B2	1.23413	1.36244
IGF1	1.23397	1.06323
C7orf41	1.23388	0.95429
LINC00087	1.23381	1.0659
RASSF10	1.23367	1.21268
NUMBL	1.23367	0.976522
SAA4	1.23363	1.16021
SRC	1.23353	0.988776
MCOLN3	1.23345	0.872223
HIST2H2BE	1.23339	1.252
SAA4	1.23337	1.20967
MTSS1L	1.2333	1.14949
RAB5C	1.23327	1.3355
A_33_P3264940	1.23313	1.33899
LOC100506036	1.23308	1.09624
RHOH	1.23303	1.53593
HIST1H1E	1.23293	1.07797
C1orf43	1.23286	0.979476
COL4A6	1.23278	1.10602
SAA4	1.23275	1.19752
SPON1	1.23266	0.943743
C6orf15	1.23251	1
MB	1.23242	1.13441
LAYN	1.23236	0.979919
SLC6A4	1.23221	1.46705
NR1D1	1.23218	1.18631
ADHFE1	1.23218	0.991799
ARPC2	1.23208	0.93217
PKDCC	1.23196	1.05676
COL1A2	1.23188	1.15194
TMSB15A	1.23177	1.85273
A_33_P3214179	1.23173	1.31025
ARPM1	1.23168	1.28319
HIST1H3H	1.23162	1.00192
CCDC132	1.23148	0.877822
PPP1R21	1.23142	0.941094
CTPS2	1.23134	0.909445
ENST00000358748	1.2313	1.66127
LOC645431	1.23076	1.00393
PPIA	1.23073	0.981802
NLRP1	1.23065	1.5334
QPCT	1.23038	1.02603
NBEAP1	1.22998	1.57982
A_33_P3346538	1.22981	1.07524
PSMD13	1.22976	1.06463
CHRDL1	1.22969	1.48461
CNGA3	1.22955	0.979661
ZNF233	1.22945	1.1581
C4orf11	1.22923	1.057
LINC00471	1.2291	1
DSCR6	1.22906	0.940666
KIRREL3	1.22895	1.44151
A_33_P3333187	1.2289	1.13405
SLC43A1	1.22882	1.11609
CORO2B	1.22878	1.09226
HIC1	1.22867	1.28194
CSNK2A1	1.22864	1.07961
LOC100653108	1.22848	1.19616
ITPK1	1.2284	0.996478
SPP1	1.22839	1.07999
SAA4	1.22835	1.17092
ARPC4-TTLL3	1.22833	1.38107
CWH43	1.22811	1.03573
A_33_P3264013	1.22807	1.09941
SSR2	1.22804	1.01374
DMRTC1	1.228	0.957496
ZNF774	1.22798	1.11555
KRT86	1.22796	0.916987
RAB5C	1.22791	1.30173
KCNK3	1.22775	1
PANX3	1.22759	1.27279
DNAH12	1.22729	1.05132
PKDCC	1.22698	0.986873
OTUD6B	1.22698	1.28481
SLC5A12	1.22698	1.01678
BC041650	1.22694	0.898146
C1QTNF4	1.22682	1.25872
PMFBP1	1.22677	1.03481
PPIA	1.22674	0.899786
BCAT1	1.22666	0.979257
ENST00000553174	1.22656	0.796738
A_33_P3409631	1.2265	1.97777
HNF1A	1.22639	1.04365
NLRP3	1.2263	1.37731
GOLGA8E	1.22608	1.39879
TES	1.22606	1.33592
CPNE7	1.22605	1.05945
FIGF	1.22597	0.934641
AK131480	1.22594	1.6513
LOC100506710	1.22584	1.13026
UROS	1.2258	0.943536
ZC3H18	1.22571	1.17488
NID2	1.22556	0.869779
IP6K2	1.2255	0.915319
ERCC-00062_278	1.22549	1.1702
CEACAM5	1.22548	1.03233
PRDX3	1.22532	1.03354
HIST1H2AM	1.22527	0.913074
PDE6G	1.22507	1.22116
PARL	1.22502	0.940026
CD200	1.22501	1.02296
PLAUR	1.22497	1.3453
ATP1A1OS	1.22492	1.29896
CYP2C18	1.22486	0.973671
ITIH1	1.22484	1.51521
ENST00000546413	1.2248	1.08741
PSMD6	1.2248	0.996563
ZNF365	1.22479	1.02169
FAM135A	1.22455	0.88232
SAT1	1.22455	1.04922
TMIE	1.22454	0.887553
TCP11	1.22437	1.14146
ACTN2	1.22399	1.48291
UGT3A1	1.22395	1.40676
NT5E	1.22387	1.36907
E2F6	1.22385	1.0079
YPEL1	1.22382	0.991646
BCMO1	1.22377	1.07315
TRIM31	1.22376	1.01123
NR0B1	1.22375	1.47713
PROC	1.22375	0.98892
JMJD7-PLA2G4B	1.22365	1.23687
PIP5K1B	1.22363	0.852419
C5orf20	1.22359	1.32624
KCNIP3	1.22348	0.880375
ZFP57	1.22347	1.25773
CAMK2N2	1.22344	1.40297
DPYSL3	1.22338	0.948169
RASD1	1.2233	1.1095
TTLL6	1.22326	1.63631
THC2530888	1.2231	1.03593
TRPV2	1.22308	1.01143
FLJ42289	1.22301	0.929878
C8orf44	1.22298	1.06478
LOC100288069	1.22275	1.22741
GPIHBP1	1.22272	1.43983
C4orf39	1.22269	1.05804
LOC283454	1.22267	1.05261
PGF	1.22259	0.91253
HPX	1.22256	1.36769
ALOX5	1.22242	0.827278
C9orf68	1.22234	0.917647
THC2529564	1.22224	1.4599
IL6	1.2222	2.27117
SNRPB2	1.22204	1.0799
CNPY1	1.22203	1.07881
KHDRBS3	1.22202	1.03025
AGAP7	1.22196	1.36416
OR2B2	1.22189	1.43313
PPIH	1.22175	0.976932
ARL4C	1.22173	1.03926
IL1B	1.22172	0.955723
SLC30A3	1.22172	1.33285
C1orf229	1.22154	1
CD101	1.22141	1
AFAP1L2	1.2212	1.04493
CRABP1	1.22085	2.51492
RNF7	1.2208	1.0348
LOC100130705	1.22074	1.25207
CAND2	1.22067	1.04785
IMPG1	1.22063	1.09024
MAFF	1.2205	1.15041
WEE2	1.22036	0.921026
PRDM8	1.22022	1.13116
ACER1	1.22021	1.64018
IL23A	1.22018	0.995719
SH3GL1P2	1.22002	1.19638
PTAR1	1.21983	1.08136
NPRL2	1.21974	0.971641
DNAH10	1.21969	1.10628
TESC	1.21968	1.20378
C12orf47	1.21962	1.00025
ALKBH3	1.21958	1.03572
FAM193A	1.21957	1.03679
HSDL1	1.21957	0.932117
PCDHB15	1.21948	1.17719
CELA2B	1.21944	1.3045
ARHGAP17	1.21937	1.28633
LOC100216001	1.21935	0.760812
RASD1	1.21935	1.06137
RAD54B	1.21929	0.865795
LOC100127961	1.21925	1
ZNF491	1.21922	1.33716
C4orf39	1.21918	1.09778
TF	1.21913	1.0491
A_33_P3322460	1.21912	1.24991
CU688199	1.21892	1.40217
RAB38	1.21886	0.91406
IGJ	1.21883	1.36756
CEACAM3	1.21878	0.958544
HSPA6	1.21872	1.35609
AGER	1.21861	1.2786
IL1A	1.21859	1.06049
EPB41	1.21847	1
MEF2B	1.21845	0.943696
MEF2B	1.21843	0.93823
CYTIP	1.2182	1.0096
ZIK1	1.21811	1.15542
NEK2	1.21807	0.979955
HIST2H2BE	1.21803	1.05129
MAFF	1.21793	1.17479
MAFF	1.21772	1.21594
BARX2	1.2175	1.27964
TCP11L2	1.21746	1.07751
RAB5C	1.21744	1.2407
MLF1	1.21743	1.06291
HIVEP3	1.21738	1.06577
FECH	1.21732	0.917022
THC2520792	1.21717	1.4622
GUCY1A3	1.21708	0.932466
LINC00324	1.21696	0.907112
LOC284751	1.21688	1.0919
CTPS2	1.21688	0.873078
RMND5A	1.21667	0.972126
TAOK3	1.21665	0.813501
RRN3	1.21654	0.993108
UXT	1.21648	0.971187
REG3A	1.21642	0.916336
ZBTB8OS	1.21634	1.19142
OLFM1	1.21628	1.25665
IL1B	1.21614	0.868722
HSPA6	1.21613	1.4898
HKDC1	1.21598	0.983229
LINC00476	1.21581	1.06024
TAS2R14	1.21577	1.12058
CHIC2	1.21574	1.07345
LOC79015	1.21567	1.55574
THC2625913	1.21567	0.947792
ENST00000390449	1.21565	1.21256
THC2511093	1.21552	1.36125
LOC399744	1.21547	1.33227
MED23	1.21542	0.923691
RMND5B	1.21532	0.995149
ADAM8	1.21526	1.07438
PPP1R21	1.21503	0.886704
FZD8	1.21502	1.00313
RND1	1.215	1.11984
CCNG2	1.21496	0.945453
TNXB	1.2149	0.88809
SCG3	1.21488	1.07993
PURB	1.21484	0.95349
FSHR	1.21475	2.14161
LOC728763	1.21469	1.2128
PTPN21	1.21465	0.900469
USP43	1.21465	1.11377
C1orf70	1.21465	1.24734
HNRNPA3	1.21459	1.18673
SULF1	1.2145	1.08677
CCDC102B	1.21445	1.10759
ANXA3	1.21443	0.877522
PLEKHG6	1.2144	1.26603
GTF2IRD2	1.21438	1.09239
A_33_P3364443	1.21423	1.05268
KIRREL3	1.21416	1.64319
PCK2	1.21408	0.791586
AK097799	1.21402	0.916908
LOC143188	1.21394	1.1522
VASH2	1.21392	1.30456
CIRBP	1.21374	1.40818
TMEM71	1.2136	1.10826
KRTAP5-1	1.2135	1.63881
LRRC3	1.21338	1.04521
A_33_P3409815	1.21328	1.05324
LOC440386	1.21322	0.877461
EID3	1.21321	0.85715
C18orf18	1.21315	1.03152
ZNF32	1.21308	0.878039
ENST00000318291	1.21306	1.05385
ERAP1	1.21296	1.47752
LRRC4	1.2129	1.02565
CDCA7	1.21289	0.954238
TAF5L	1.21285	1.24156
TCP10	1.21284	1.08011
CHIC2	1.21272	1.06224
RDH5	1.21267	1.22868
SLC9A5	1.21265	1.18346
BAI2	1.21264	1.11743
CHIA	1.21264	1.45069
NXF5	1.2126	1.14392
DYNC2H1	1.21257	1.08477
GNB1	1.21255	0.873082
TERT	1.21251	1.45821
DIS3L2	1.21238	1.54035
RBBP9	1.21235	0.984752
STEAP1	1.21232	1.10576
LRRD1	1.21223	1.40175
RPRD1A	1.21212	1.21804
MCOLN3	1.21193	0.878404
DUSP6	1.21193	1.09699
NGB	1.21186	1.20559
BBS9	1.21178	0.875808
IVNS1ABP	1.21175	0.968822
RPS6KB1	1.21171	0.875132
ICAM5	1.21151	1.12419
SCD5	1.2115	1.22348
KIRREL3	1.21142	1.49253
LINC00319	1.21135	1.28568
LOC100270746	1.21124	0.989
THOC4	1.21124	1.09023
HEATR8	1.21121	1
PLAU	1.21111	1.04923
COA5	1.21106	0.989909
MLLT4	1.21092	1.08644
ZNF285	1.21089	1.02609
LOC440896	1.21078	1.1595
ZMAT4	1.21076	1.07299
NFE2L1	1.21068	1.09329
MYL2	1.21055	1
ARMCX6	1.21048	1.05936
ENST00000369884	1.21047	1.03283
THC2675322	1.21013	1.13211
IRF9	1.21011	1.04041
SHC2	1.2101	1.07907
HTR5A	1.20982	1.03962
PIAS2	1.20978	1.02157
THC2675322	1.20962	1.32863
ARPM1	1.20945	1.105
AGBL4	1.20938	0.967473
LOC728537	1.20934	1.04705
PCP4	1.20928	2.17514
ANXA3	1.20926	0.888848
TMEM184A	1.2091	1.36704
ZNF487P	1.20896	0.916066
SIM1	1.20888	0.991262
FILIP1L	1.20883	1.0552
BNIP3L	1.20871	0.991083
RBL1	1.20865	1.02401
SLC6A16	1.20861	0.986544
SERPINC1	1.20849	0.953525
ASB13	1.20846	1.18298
CLDN7	1.20839	1.15512
LOC144571	1.20839	1.10911
C10orf120	1.20836	1.01426
DLGAP4	1.20826	0.937649
KIAA0889	1.20826	1.48769
THC2772510	1.20825	1.10017
MECOM	1.20822	0.932458
CTPS2	1.20811	0.928453
ENST00000390463	1.20805	1.65996
ETG09_48764	1.20803	0.715346
LRRC17	1.20794	0.912346
KCTD15	1.20792	1.29217
A_33_P3377090	1.20787	1.13088
UGGT2	1.20787	1.07354
COL14A1	1.20768	1.22871
PMFBP1	1.20767	1.44797
MAFF	1.20766	1.16848
PPIA	1.20763	0.91333
ADAL	1.20758	1.04145
BMPER	1.20753	1
AIMP1	1.20748	0.988484
DAPL1	1.20743	1.02225
GCNT3	1.20743	1.18956
C17orf80	1.20742	0.930341
C22orf13	1.20731	1.74493
RAB5C	1.20703	1.33454
PILRB	1.20692	1.37631
CACNG3	1.2069	1.22566
POGZ	1.20687	0.926072
NBPF10	1.20684	0.982628
NCOA4	1.20665	1.00225
OR52N2	1.20665	1.06973
A_24_P32215	1.20653	1.02729
RIPK3	1.2064	1.44566
C4orf38	1.20635	1.24944
DFNB59	1.20615	0.934567
LOC100130433	1.20598	1.30004
TES	1.20591	1.19043
CTPS2	1.2059	0.94743
DAPK2	1.2059	1.13319
FAM193B	1.20587	1.14535
RASSF10	1.20587	1.18488
TRIL	1.20537	0.891574
ARSH	1.20528	1.17238
GLB1L3	1.20523	1.34218
ZNF485	1.20517	0.9629
DRD4	1.20516	1.02498
SLAMF1	1.20507	1.24912
SEMA4D	1.20499	0.944091
PPP1R3E	1.20486	1.18836
OSBPL2	1.20484	1.1457
MMP23B	1.20478	1.18818
SERPINC1	1.20474	0.825833
RHCE	1.20454	1.08976
C13orf26	1.20445	1.23709
HAPLN2	1.20445	1.64672
AK022140	1.20422	0.991184
AGT	1.20415	0.996585
PPP1R13B	1.20407	1.48322
A_33_P3352268	1.20397	1.54029
A_33_P3326151	1.20362	1.28994
ZNF780B	1.20362	1
THBS4	1.20361	1.11457
ZNF165	1.20358	0.950601
C10orf111	1.20354	0.961422
DDX1	1.20353	0.92623
LOC100129763	1.20347	1.38596
UMODL1	1.2034	1.11193
TAB2	1.20336	0.947162
TMEM62	1.20335	1.05919
MAPK9	1.20325	1.00949
MST4	1.20322	0.916232
RTKN2	1.20317	1.31692
MSL3	1.20298	0.990161
TAF1C	1.20288	0.937359
C20orf94	1.20268	2.26905
DLGAP3	1.20261	1.35423
RGN	1.20256	1.08422
SLC39A5	1.20255	1
AGT	1.20252	1.04524
SSC5D	1.2025	1.04829
CD19	1.2025	0.972678
TIGD1	1.20244	1.17848
METTL10	1.20222	1.08152
ENST00000517927	1.20222	1.21253
IL10	1.202	1.29738
LOC100270804	1.20197	0.981179
CCDC8	1.20193	1.18479
ENST00000427872	1.2019	1.52402
NFKBIA	1.20186	1.07908
PSMA1	1.2018	1.08197
NFKBIA	1.20159	1.09428
RABL2A	1.20157	0.993694
ASNS	1.20156	1.01636
KLHL12	1.20147	0.916424
ETV5	1.2014	1.22069
KIFC2	1.20057	1.3516
FTMT	1.20051	1.14792
ZNF594	1.20039	0.898867
GALNT14	1.19986	1.02999
SERF2	1.19956	0.978107
GIT2	1.19955	1.02165
PAK1IP1	1.19944	0.92617
CORO2B	1.19942	1.04305
LOC727869	1.1992	1.1824
ST8SIA5	1.1991	0.963638
BRP44	1.19909	1.07038
ARPM1	1.19907	1.10044
ZMIZ2	1.19905	1.00521
ENST00000447139	1.19901	0.95851
AP3S1	1.19886	0.988012
A_24_P458252	1.19884	1.00476
APC	1.19874	1.42868
ACTR3BP2	1.19866	1.50964
PLAU	1.19864	1.06442
BU659163	1.19864	1.63683
C20orf106	1.19856	0.80165
NIPAL2	1.19856	0.871756
VIM	1.19853	0.935559
ENST00000390446	1.19848	1.00416
ZNF248	1.19847	1.03074
NDOR1	1.19843	1.35604
APP	1.19841	1.0631
PTN	1.19825	0.978004
PARK7	1.19824	0.980675
ACCS	1.1981	1.25483
LRCH3	1.19802	1.33316
NT5M	1.19758	0.999539
RGL1	1.19756	0.934982
NFKBIA	1.19745	1.10497
SNAR-G1	1.19737	1.13288
FGFBP3	1.19734	0.959316
HIST1H2AI	1.19733	0.954861
ISLR2	1.19723	1.256
PPARG	1.19722	1.14268
NFKBIA	1.19722	1.09025
MFNG	1.1972	1.14222
ZFP64	1.19713	0.868228
ENST00000366713	1.19713	1.01233
ARL14	1.19712	0.999074
CCDC110	1.1971	1.05985
SFPQ	1.19708	0.997433
RBFOX2	1.197	1.1307
HIST2H2BF	1.19693	0.966292
TUBB4A	1.19687	1.18012
NFKBIA	1.19686	1.0976
C4orf36	1.19678	0.995704
DDX31	1.19677	1.25686
FAM193A	1.19669	1.05242
ENST00000382320	1.19663	1.00941
RASD1	1.19658	1.07444
TES	1.19645	1.27299
BRP44	1.19638	1.04893
WDR93	1.19619	1.27689
SELS	1.19619	1.0988
BRP44	1.19606	1.06379
KY	1.19601	0.799023
RHOH	1.19598	1
PDXDC2P	1.19587	1.32624
KLHL31	1.19584	0.904713
ENST00000331856	1.19583	1.00246
TNFAIP8L3	1.19579	1.26194
LOC150185	1.19576	1
ATP2B4	1.19563	1.24011
LOC285141	1.19562	0.974993
IL15RA	1.19562	1.12658
PDE2A	1.19561	1.06594
ZNF570	1.19557	0.859242
CLEC2A	1.19557	1.117
RTN4IP1	1.19555	1.02549
PLCB4	1.19552	1.06247
LOC643923	1.19549	1.04457
AA412392	1.19544	1.3419
ASGR1	1.19542	0.921867
SVOP	1.1954	0.79333
CEACAM1	1.19518	1.00628
PRCD	1.19507	1.54837
C7orf34	1.19503	1.19071
C9orf71	1.19486	1.22091
THC2774746	1.19486	1.4588
TTC32	1.19476	1.01883
TRIM36	1.19471	0.884181
PPIP5K1	1.1947	1.3269
NUDT21	1.19467	1.04279
LNPEP	1.19457	1.04669
GRAMD1B	1.19455	1.4477
PCF11	1.19454	0.97046
OR4D10	1.19451	1.19759
IL1B	1.1945	0.931082
PLD4	1.19449	1.10145
CXCL12	1.19446	1.03005
RHOH	1.19445	1.62888
TMX4	1.19431	0.891554
RGS11	1.1943	1.62586
SLC30A2	1.19419	1.0991
EEF1A1	1.19412	1.04315
RAB5C	1.19406	1.2848
TMEM17	1.19402	1.04972
ARPC2	1.19398	0.949885
EXOC7	1.19393	1.51252
PBLD	1.19391	1.16883
A_33_P3245126	1.19391	1.1145
LOC400682	1.19375	1.0669
THC2572285	1.19372	1.17673
CMAHP	1.19366	0.995194
A_24_P84608	1.19351	1.04097
NP414419	1.19351	1.29547
ERCC6	1.1935	0.865972
AIMP1	1.19347	1.00397
ATP2B4	1.1934	1.00607
ZNF662	1.19335	1.13005
SNAPC5	1.19332	1.14297
ENST00000538668	1.19315	1.81051
C1orf51	1.19312	1.11719
WDR33	1.19308	0.888234
RNPS1	1.19301	1.0885
DNAJC11	1.193	1.4227
C1QTNF8	1.19298	1.11373
AIDA	1.19293	0.933874
CMTM1	1.19287	2.57694
KLC2	1.19284	1.22441
SPC24	1.19281	1.95897
MSH5	1.19275	1.2936
E2F8	1.19269	0.995611
ESRRA	1.19266	1.23482
SEC14L2	1.19264	1.09961
PPP1R8	1.1926	1.17344
CEACAM3	1.19248	0.957985
CHST7	1.19242	1.04087
MTHFD2L	1.19208	0.934591
PLK3	1.19197	1.07199
NPHP4	1.19193	1.35946
SLITRK6	1.19192	1.15627
LOC284939	1.1919	1.05275
FAM125A	1.1919	1.15442
RAMP1	1.19186	0.843984
CBS	1.19178	0.98518
A_33_P3369731	1.19174	1.16072
CD46	1.19162	0.852181
CPXM2	1.19157	0.941233
CTSS	1.19149	0.939859
CXCL12	1.19146	0.995884
KCNK12	1.19145	1.34416
FERMT1	1.19139	0.988439
TTLL4	1.19132	0.937039
RNF7	1.19119	1.08364
C2CD4B	1.19111	1.05881
PDGFA	1.19111	1.09275
RBM47	1.19107	1.02638
COL28A1	1.19102	1.36027
PSMD6	1.19101	0.967892
PSMC5	1.19085	1.00649
NFKBIA	1.19074	1.06628
THC2600547	1.19071	1.15186
PIK3IP1	1.19064	1.0531
IGLL1	1.19057	1.35969
NCF4	1.19054	1.10347
ZNF527	1.19051	1.35706
ANXA3	1.19048	0.92699
ENST00000423354	1.19046	0.974318
C19orf50	1.19046	1.05818
FLJ37453	1.19044	0.97286
NSMAF	1.19033	0.933581
CLDN12	1.19033	0.841052
ZNF485	1.1902	1.03627
ZDHHC3	1.19019	0.92277
CCDC74B	1.19015	1.1088
SRGAP2	1.19014	0.972842
OTUD6B	1.19008	1.18534
ITLN2	1.19005	1.24206
ANKRD20A2	1.18998	1.43338
PPIA	1.18994	0.9405
A_33_P3286704	1.18989	0.985627
AGMAT	1.18968	1.13344
TYRP1	1.18945	1.10213
ELK3	1.18932	0.903823
LOC728178	1.18902	1.08807
A_33_P3368445	1.18896	1.05675
RENBP	1.18894	1.20191
PCDH1	1.18888	1.02713
LOC100132167	1.18888	0.99231
INCENP	1.18879	1.05921
RAB28	1.18878	1.04864
LOC338799	1.18872	1.1618
PASK	1.18864	1.11272
A_33_P3236117	1.18858	1.07804
A_33_P3263157	1.18842	0.993344
ARHGAP33	1.18841	1.10754
LOC645676	1.1884	0.987212
DRD2	1.18838	1.09492
NKX2-8	1.18836	1.15699
RBM6	1.18836	1.1189
ZNF280D	1.18833	0.84632
THC2493034	1.18832	1.22501
RNU4ATAC	1.18829	1.25596
A_33_P3416414	1.18826	0.945286
BCL2L13	1.18822	1.03466
ARPC2	1.18821	0.905503
DNAJC27	1.18816	1.12711
OR1L6	1.1881	1.303
KIAA1274	1.18807	1.08887
OR13A1	1.18807	0.94109
RFX8	1.18801	1.13969
NFKBIA	1.18798	1.09032
MUC5AC	1.18798	1.55153
APH1A	1.18794	1.1303
RASD1	1.18786	1.09873
ARPC2	1.18785	0.925718
OPTC	1.18783	0.911961
ZNF852	1.18783	1.10926
PDGFA	1.18771	1.05284
USP35	1.18766	1.09771
KIRREL3	1.18743	1.63414
LOC100132481	1.1874	1.13782
PSMD3	1.1874	1.28158
CR591103	1.18734	0.999269
OR2H2	1.18728	1.09582
LINC00511	1.18715	1.09377
HPS4	1.18708	1.30574
NKAIN2	1.18707	1.70732
BCL11A	1.18705	1.12617
MOSPD1	1.187	0.951793
RIMBP3	1.18699	0.985536
ARPM1	1.18698	1.16471
EXOG	1.18697	0.800321
ZNF511	1.18691	1.35908
CD38	1.18689	1.06793
SIK2	1.18689	0.999648
GGA1	1.18686	1.11999
NOTCH2	1.18685	1.08181
LOC257396	1.18682	1.13003
LOC644554	1.1866	1.1856
RPL4	1.1866	0.994295
PLEKHN1	1.18658	0.944198
MAFF	1.18657	1.2094
A_32_P148476	1.18656	0.841827
KDM5C	1.18656	1.17173
CHMP3	1.1865	1.03788
BSDC1	1.18641	1.11957
ARHGAP39	1.1864	0.953072
LOC100131257	1.18636	1.18553
SRSF5	1.18633	1.19907
PSMD6	1.18629	1.00509
ZNF582	1.18626	1.08086
RBM20	1.18624	1.02412
C20orf201	1.18623	1.09962
BX648392	1.18616	1.53617
ENST00000356801	1.18608	0.928772
RASD1	1.18603	1.07601
CASP9	1.18592	1.03075
ZNF70	1.18577	1.09451
C14orf128	1.18576	1.1312
THUMPD2	1.18567	0.776159
GOLGA6L6	1.1856	1.19706
ZNF516	1.18553	1.09735
A_32_P31992	1.18552	1.0056
GGTLC1	1.18551	1.2
PAQR6	1.18548	1.09997
A_33_P3412695	1.18544	1.14393
AK056419	1.1854	1.09707
ATP1A4	1.1854	1.02014
IL6ST	1.1854	1.08169
ENO4	1.18536	1.04272
ZDHHC20	1.18532	0.879685
UPB1	1.1853	1
AIP	1.18529	1.11495
LOC158402	1.18527	1
GNB5	1.18526	0.888681
TRIM17	1.18524	1.36808
SAA4	1.18519	1.14052
FNDC9	1.18516	1.19606
ARHGAP11B	1.18515	0.699342
FAM193A	1.18514	0.969943
ZNF280B	1.18512	1.09332
DENND2A	1.18512	1.10393
THYN1	1.18508	1.0531
[truncated: 42,396 more rows]
